# Supplementary material for: Proteomics Reveal Enhanced Oxidative Stress Responses and Metabolic Adaptation in Acidithiobacillus ferrooxidans Biofilm Cells on Pyrite
Source: PubMed Central journal article supplement (PMC6450195; doi:10.3389/fmicb.2019.00592), 2019-03-29
Supplement: Data_Sheet_1.pdf [file Data_Sheet_1.pdf]

**Proteomics reveal enhanced oxidative stress responses and metabolic adaptation in *Acidithiobacillus ferrooxidans* biofilm cells on pyrite**

**Sören Bellenberg<sup>1,2\*</sup>, Dieu Huynh<sup>3</sup>, Ansgar Poetsch<sup>4,5</sup>, Wolfgang Sand<sup>2,3,6</sup>, Mario Vera<sup>7,8\*</sup>**

**\*Correspondence:** soeren.bellenberg@lnu.se, mariovera@uc.cl

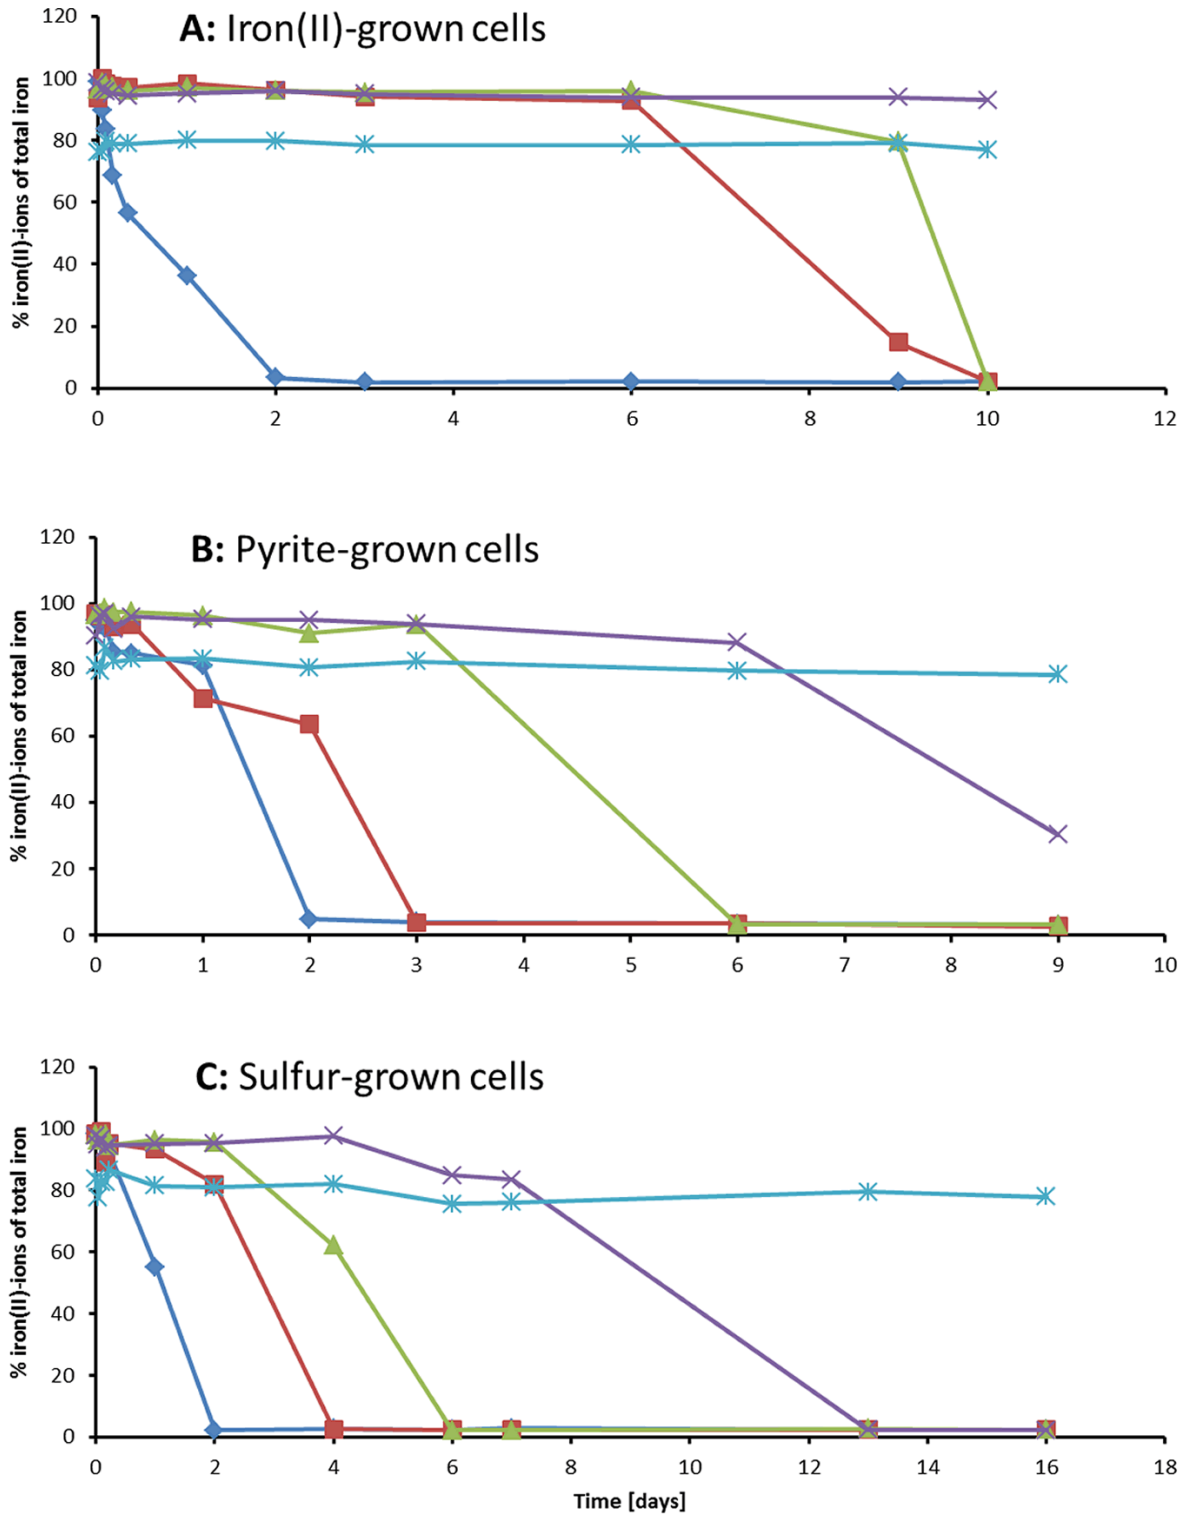

Supplemental Figure 1. The growth substrate influences *A. ferrooxidans*<sup>T</sup> cells sensitivity towards H<sub>2</sub>O<sub>2</sub>. Before addition of the substrate iron(II)-ions (54 mM), iron(II)- (A), pyrite- (B) or sulfur-grown cells (C) were preincubated for 24 h with different concentrations of H<sub>2</sub>O<sub>2</sub>. The development of the percentile fraction of iron(II)-ions in assays with 0 (blue diamonds), 0.1 (red boxes), 0.5 (green triangles), 1 (violet crosses) and 5 mM H<sub>2</sub>O<sub>2</sub> (light blue crosses) during the preincubation is shown.

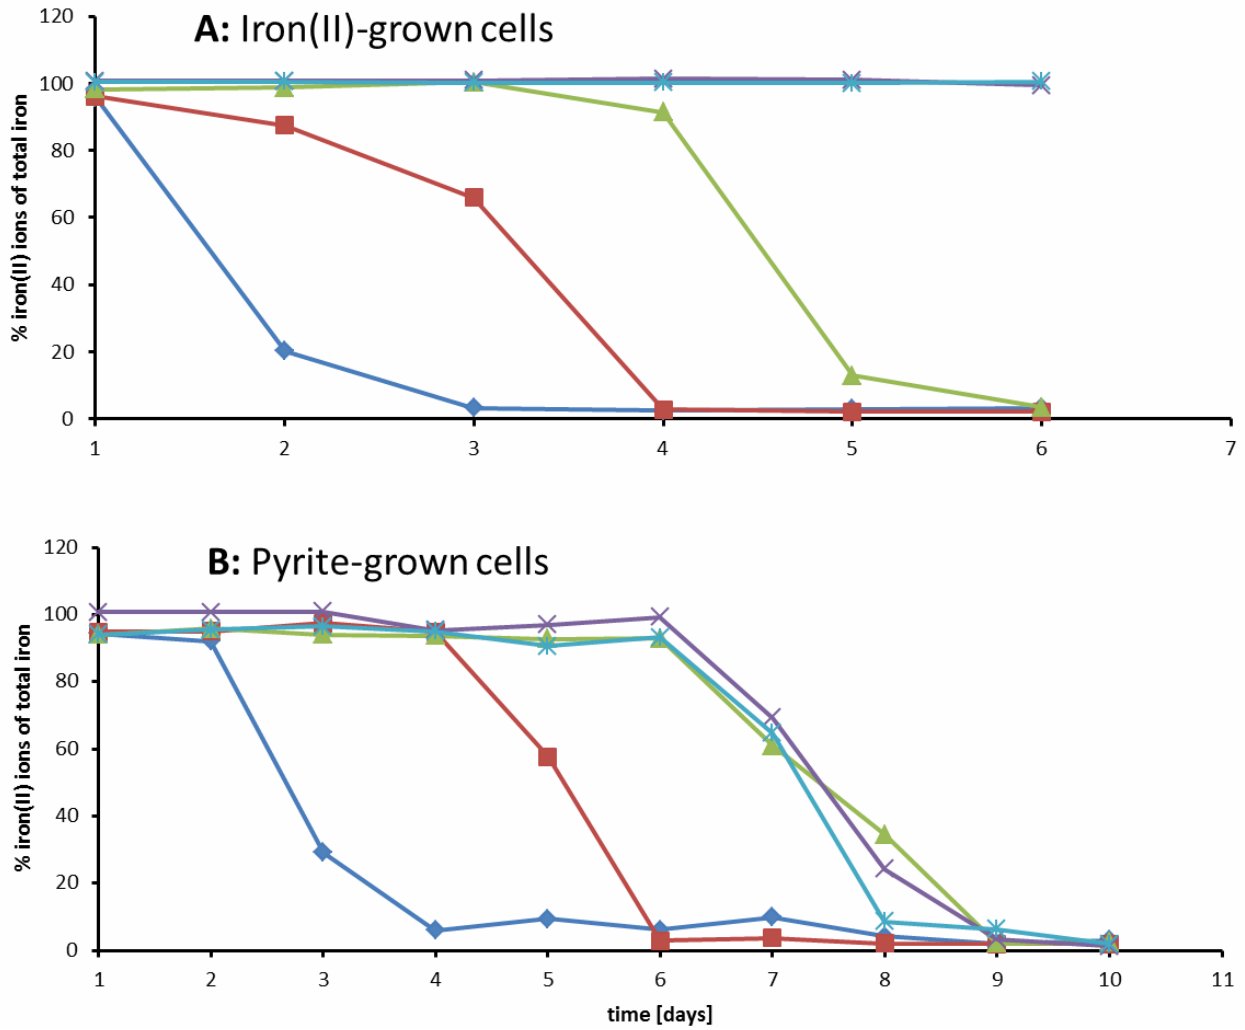

Supplemental Figure 2. Pyrite-grown cells are less sensitive to  $H_2O_2$  than iron(II)-grown cells. The duration of exposure influences *A. ferrooxidans*<sup>T</sup> cells sensitivity towards  $H_2O_2$ . Before addition of the substrate iron(II)-ions (54 mM), iron(II)- (A) or pyrite-grown cells (B) were preincubated for different periods of time with 1 mM  $H_2O_2$ . The development of the percentile fraction of iron(II)-ions in assays with 0 (blue diamonds), 2 (red boxes), 6 (green triangles), 12 (violet crosses) and 24 h (light blue crosses) preincubation is shown.
